1 **Loss of the centrosomal protein ALMS1 alters lipid**  
2 **metabolism and the regulation of extracellular**  
3 **matrix-related processes**

4 Brais Bea-Mascato<sup>1,2</sup>, Eduardo Gómez-Castañeda<sup>4</sup>, Yara E. Sánchez-Corrales<sup>3</sup>, Sergi  
5 Castellano<sup>3,5</sup>, Diana Valverde<sup>\*1,2</sup>

6

7 <sup>1</sup> CINBIO, Universidad de Vigo, 36310, Spain.

8 <sup>2</sup> Grupo de Investigación en Enfermedades Raras y Medicina Pediátrica, Instituto de  
9 Investigación Sanitaria Galicia Sur (IIS Galicia Sur), SERGAS-UVIGO, Vigo, Spain

10 <sup>3</sup> Genetics and Genomic Medicine Department, Great Ormond Street Institute of Child  
11 Health, University College London, London, United Kingdom

12 <sup>4</sup> Molecular and Cellular Immunology Section, Great Ormond Street Institute of Child  
13 Health, University College London, London, United Kingdom

14 <sup>5</sup> UCL Genomics, Zayed Centre for Research into Rare Disease in Children, University  
15 College London, London, United Kingdom

16 \*Correspondence: Diana Valverde. Email [dianaval@uvigo.es](mailto:dianaval@uvigo.es)

17 CINBIO Facultad de Biología, Universidad de Vigo, Campus As Lagoas-Marcosende s/n,  
18 36310 Vigo, Spain

19 Tel +34 986 811 953

## 20 **ABSTRACT:**

21 **Background:** Alström syndrome (ALMS) is a rare autosomal recessive disease that is  
22 associated with mutations in *ALMS1* gene. The main clinical manifestations of ALMS are  
23 retinal dystrophy, obesity, type 2 diabetes mellitus, dilated cardiomyopathy and multi-  
24 organ fibrosis, characteristic in kidneys and liver. Depletion of the protein encoded by  
25 *ALMS1* has been associated with the alteration of different processes regulated *via* the  
26 primary cilium, such as the NOTCH or TGF- $\beta$  signalling pathways. However, the cellular  
27 impact of these deregulated pathways in the absence of *ALMS1* remains unknown.

28 **Methods:** In this study, we integrated RNA-seq and proteomic analysis to determine the  
29 gene expression profile of hTERT-BJ-5ta *ALMS1* knockout fibroblasts after TGF- $\beta$   
30 stimulation. In addition, we studied alterations in cross-signalling between the TGF- $\beta$   
31 pathway and the AKT pathway in this cell line.

32 **Results:** We found that *ALMS1* depletion affects the TGF- $\beta$  pathway and its cross-  
33 signalling with other pathways such as PI3K/AKT, EGFR1 or p53. In addition, alterations  
34 associated with *ALMS1* depletion clustered around the processes of extracellular matrix  
35 regulation and lipid metabolism in both the transcriptome and proteome. By studying  
36 the enriched pathways of common genes differentially expressed in the transcriptome  
37 and proteome, collagen fibril organisation,  $\beta$ -oxidation of fatty acids and eicosanoid  
38 metabolism emerged as key processes altered by the absence of *ALMS1*. Finally, an  
39 overactivation of the AKT pathway was determined in the absence of *ALMS1* that could  
40 be explained by a decrease in *PTEN* gene expression.

41 **Conclusion:** *ALMS1* deficiency disrupts cross-signalling between the TGF- $\beta$  pathway and  
42 other dependent pathways in hTERT-BJ-5ta cells. Furthermore, altered cross-signalling  
43 impacts the regulation of extracellular matrix-related processes and fatty acid  
44 metabolism, and leads to over-activation of the AKT pathway.

45 **Keywords:** *ALMS1*, TGF- $\beta$ , AKT, primary cilia, ciliopathy, ECM, lipid metabolism, Alström  
46 syndrome.

## 47 INTRODUCTION:

48 Alström syndrome (ALMS, OMIM #203800) is a rare disease caused by mutations in the  
49 *ALMS1* gene. The subcellular localisation of the ALMS1 protein in the basal body of the  
50 primary cilium, composed of two centrioles, classified ALMS as a ciliopathy (Hearn et al.,  
51 2005; Knorz et al., 2010; Jagger et al., 2011; Kobayashi and Dynlacht, 2011). Ciliopathies  
52 are a group of diseases on which, the normal function and assembly of the primary cilia  
53 is affected. This ciliopathy is clinically characterised by the development of retinal  
54 dystrophy, type 2 diabetes mellitus (T2DM), obesity, dilated cardiomyopathy (DCM),  
55 hearing loss and multi-organ fibrosis affecting kidneys, liver and lungs (Collin et al., 2002;  
56 Zulato et al., 2011; Hearn, 2018).

57 Primary cilia are sensory organelles formed by microtubules protruding from the cell  
58 membrane. They are essential for a variety of physiological and developmental  
59 processes such as the control of cell cycle, migration and differentiation (Christensen et  
60 al., 2017; Pala et al., 2017; Anvarian et al., 2019). They also play a role in the regulation  
61 of various signalling pathways, such as WNT, Sonic Hedgehog (SHh), transforming  
62 growth factor  $\beta$  (TGF- $\beta$ ) and other G-protein-coupled receptor-regulated pathways  
63 (Ishikawa and Marshall, 2011; May-Simera et al., 2017, 2018; Pala et al., 2017; Anvarian  
64 et al., 2019).

65 The role of the ALMS1 protein is still unclear, with some (Graser et al., 2007; Li et al.,  
66 2007; Knorz et al., 2010) but not all (Collin et al., 2005, 2012; Hearn et al., 2005; Chen et  
67 al., 2017) studies suggesting a role in ciliogenesis. ALMS1 depletion, however, affects  
68 several signalling pathways regulated through primary cilia, such as the NOTCH and TGF-  
69  $\beta$  pathways (Leitch et al., 2014; Álvarez-Satta et al., 2021; Bea-Mascato et al., 2022). In  
70 the NOTCH signalling pathway, ALMS1 depletion leads to the accumulation of receptors  
71 in late endosomes. However, it does not affect the recycling of these receptors in the  
72 cell line hTERT-RPE1 (Leitch et al., 2014). In the TGF- $\beta$  pathway, inhibition of *ALMS1*  
73 expression lowers phosphorylation/activation of SMAD2 in hTERT-RPE1 (Álvarez-Satta  
74 et al., 2021), which could inhibit the canonical TGF- $\beta$  pathway. Similar results have been  
75 described when abolishing other centrosomal proteins. For example, depletion of  
76 CEP128 decreases SMAD2 phosphorylation in zebrafish, hTERT-RPE1 and ciliated human

77 foreskin fibroblasts (hFF) after TGF- $\beta$  activation (Mönnich et al., 2018). However, these  
78 alterations were not observed in ALMS1 knockout models in HeLa or hTERT-BJ-5ta (Bea-  
79 Mascato et al., 2022). In these models the only alteration detected in the canonical  
80 pathway was a slight decrease in SMAD3 phosphorylation/activation in the hTERT-BJ-  
81 5ta model (Bea-Mascato et al., 2022). This suggests that alterations in the TGF- $\beta$   
82 pathway in the absence of ALMS1 may have a greater impact on other signalling  
83 pathways that cross-signal with this pathway such as PI3K/AKT or MAPKs (p38, c-JNKs  
84 and others) (Finsson et al., 2020).

85 Despite advances in recent years, little is known about the role of ALMS1 in primary cilia  
86 and its regulated signalling pathways. Here, we investigate at the RNA and protein level  
87 how the absence of ALMS1 expression in hTERT-BJ-5ta affects the TGF- $\beta$  pathway and  
88 other cellular processes.

## 89 **MATERIALS AND METHODS:**

### 90 **Cell culture:**

91 hTERT-BJ-5ta human dermal fibroblasts and HeLa cell lines from American Type Culture  
92 Collection (ATCC) were used for this study. A 4:1 composite medium of Dulbecco's  
93 minimum essential medium (DMEM, Gibco, Invitrogen, NY, USA) and Medium 199,  
94 Earle's Salts (Gibco, Invitrogen, NY, USA), supplemented with 10% fetal bovine serum  
95 (FBS) (Gibco, Invitrogen, NY, USA) and 2% penicillin/streptomycin (P/S) (Gibco,  
96 Invitrogen, NY, USA) was used to maintain hTERT-BJ-5ta. DMEM medium supplemented  
97 with 10% FBS and 2% P/S was used for the HeLa cells. Both cell lines were cultured at  
98 37°C with 5% CO<sub>2</sub>.

### 99 **RNA extraction:**

100 Initially, 3x10<sup>5</sup> BJ-5ta cells were seeded in 6-well plates by triplicate in DMEM:199  
101 10%FBS 2% P/S. After 24h a change of medium was made by adding DMEM:199 2% P/S  
102 without FBS and cells were incubated overnight for serum starvation. Next day, TGF- $\beta$   
103 pathway was stimulated by adding rhTGF- $\beta$ 1 ligand (2ng/mL; R&D Systems; 240-B) for  
104 24 hours. Then, the medium was removed, and wells were washed twice with PBS. Cells

105 were harvested in a tube of 1.5 mL after scraping them on PBS. The NYZ total RNA  
106 isolation kit (NYZtech, Lisboa, Portugal) was applied following the manufacturing  
107 protocol for RNA extraction. Finally, RNA was eluted, and sample concentrations were  
108 measured with nanodrop (Thermo Fisher, Waltham, USA).

### 109 **RNA-seq and library construction:**

110 RNA quality control was performed using Bioanalyzer (Agilent, Santa Clara, USA), finding  
111 a RIN  $\geq$  7. Then, RNA enrichment was carried out with the Dynabeads mRNA direct Micro  
112 kit (Life Technologies, Carlsbad, USA) following manufacturer's protocol. Sequencing  
113 libraries were constructed from cDNA using the Ion Total RNA-seq Kit v2 with ERCC RNA  
114 Spike-in Control mix (Thermo Fisher, Waltham, USA). 25 $\mu$ L of each library was  
115 sequenced using a PI V2 chip in an Ion Proton Sequencer (Thermo Fisher, Waltham,  
116 USA).

117 After sequencing, fastq files were analysed in the Finisterrae II computer cluster of the  
118 "Centro de Supercomputación de Galicia" (CESGA). FastQC ([http://www](http://www.bioinformatics.babraham.ac.uk/projects/fastqc)  
119 [.bioinformatics.babraham.ac.uk/projects/fastqc](http://www.bioinformatics.babraham.ac.uk/projects/fastqc)) and MultiQC (Ewels et al., 2016) were  
120 used to determine the quality of the samples (**Figure S1 A**). High-quality reads were  
121 aligned with STAR software (Dobin et al., 2013) using the primary assembly of Homo  
122 sapiens genome GRCh38.p13 (Gencode v32). We generated a count matrix using the  
123 HTSeq software (Anders et al., 2015). Downstream analysis was performed with the  
124 following R (version 4.0.5) packages: DESeq2 (Love et al., 2014) to detect differentially  
125 expressed genes (DEG; **Figure S1 B-D; Table S1**); and EnrichR (Kuleshov et al., 2016) for  
126 enrichment analysis of GO terms and Pathways, collected from different databases  
127 (Bioplanet, KEGG, MSigDB and wikipathway) (**Table S3**). P-values were calculated using  
128 Fisher's exact test and corrected using Benjamini-Hochberg (FDR). Finally, ggplot and  
129 pheatmap were used for the visualisation of the results (Wickham, 2016). To validate  
130 our homemade DESeq2 pipeline, SARTools (Varet et al., 2016) was applied and the same  
131 number of DEG was obtained.

132 The sequences generated in this work have been deposited in NCBI's Gene Expression  
133 Omnibus (Barrett et al., 2013) and are accessible through GEO Series accession number  
134 GSE209844.

## 135 **Protein extraction:**

136 BJ-5ta cells were seeded at  $3 \times 10^5$  in 6-well plates by triplicate in DMEM:199 10%FBS  
137 2%P/S. After 24 hours, FBS was removed from the medium and the cells were incubated  
138 overnight for serum starvation. The next day, cells were stimulated with rhTGF- $\beta$   
139 (2ng/mL) for 24 hours. After that, DMEM:199 was removed, and wells were washed  
140 twice with PBS. Cells were scrapped in PBS. Then, they were pellet at 10000 rpm for 5  
141 min in a Sigma® 1–14 K at 4°C and 100 $\mu$ L of RIPA buffer was added to each sample for  
142 cell lysis. Samples were incubated on ice for 10 min in constant agitation. Finally, cell  
143 debris was pelleted by centrifugation for 30 min at 12000 rpm and 4 °C. Samples were  
144 aliquoted and stored at -80 °C until the next step of the protocol. Protein quantification  
145 was performed by Bradford microplate assay using Bio-Rad protein assay (Bio-rad,  
146 Hercules, USA).

## 147 **Label-free proteomic profiling:**

148 Label-free proteomic profiling was performed following the same protocol described in  
149 (Bea-Mascato et al., 2022) with the corresponding quality controls (**Figure S2; Table S2**).  
150 Ggplot and pheatmap were used for the results visualisation. Enrichment analysis was  
151 performed using the same protocol as described for the transcriptome (**Table S4**). The  
152 mass spectrometry proteomics data of this study have been deposited to the  
153 ProteomeXchange Consortium via the PRIDE (Perez-Riverol et al., 2019) partner  
154 repository with the dataset identifier PXD035708.

## 155 **Networks generation:**

156 For the generation of the different networks, we used the programme Cytoscape (3.9.0)  
157 with Java (11.0.6). For the generation of the enriched route networks, the pipeline  
158 described by Reimand et al.(Reimand et al., 2019) was used. Similarity coefficients  
159 between nodes (minimum threshold of 0.375) were calculated using the arithmetic  
160 mean between the overlap coefficient and the Jaccard index of the different significantly  
161 enriched gene sets in the enrichment analysis (FDR < 0.05). After this procedure, the  
162 clusters were annotated using the plugins ClusterMaker2, wordCloud and  
163 autoanotation. The MCL algorithm was used via the ClusterMaker2 plugin to determine

164 the clusters and then wordCloud and autoannotation were used to annotate the  
165 clusters. The settings were maintained to generate the networks of the different  
166 datasets.

### 167 **p-AKT/AKT activation assays:**

168 Initially, about  $3 \times 10^6$  BJ-5ta control and ALMS1 knockout (KO) cells were plated in  
169 100mm dishes (Corning, NY, USA) in DMEM:199 2P/S% without FBS for serum  
170 starvation. After 24h of incubation, the rhTGF- $\beta$ 1 ligand was added at a final  
171 concentration of 2ng/mL for 0-, 10-, 30-, and 90-min. Dishes were then washed 3 times  
172 with PBS and harvested in 1mL of PBS, using a scraper. After that, cells were pelleted by  
173 centrifugation in a Sigma® 1–14 K at 4°C, 7,400 $\times$ g for 10 min and lysed on ice for 10 min  
174 using 200  $\mu$ L of RIPA buffer, containing 1 mM sodium orthovanadate as phosphatase  
175 inhibitor (Sigma-Aldrich, Missouri, USA) and 0.1% (v/v) protease inhibitor cocktail  
176 (Merck, Darmstadt, Germany). To remove the pellet with cell debris not lysed with RIPA  
177 buffer, samples were centrifuged at 4°C, 14,500 $\times$ g for 30 min, and the supernatant was  
178 collected in 1.5mL low binding tubes (Thermo Fisher, Waltham, USA). For protein  
179 quantification, the Bio-Rad protein assay reagent was used in a microplate assay. Finally,  
180 samples were stored at -80°C until analysis.

### 181 **SDS-PAGE, Western blot and quantification:**

182 Samples were prepared mixing 20 $\mu$ g of protein from each sample with 6.25 $\mu$ L of  
183 Laemmli Buffer 4X (Biorad, Hercules, USA), 1.25 $\mu$ L  $\beta$ -mercaptoethanol (BME) and H<sub>2</sub>O<sub>d</sub>  
184 up to a final volume of 25 $\mu$ L. After that, samples were boiled at 97°C for 5 min and run  
185 on a 12% Mini-PROTEAN® TGX™ Precast Gel (Biorad, Hercules, USA) for 1 hour at 150V.  
186 Proteins were then transferred to a 0.2  $\mu$ m polyvinylidene fluoride (PVDF) membrane  
187 using the Trans-Blot® Turbo™ Transfer System (Biorad, Hercules, USA) following the  
188 mixed molecular weight (MW) protocol. Membranes were blocked with in-house TBS-T  
189 buffer [TBS/0.1% (v/v) Tween-20] with 5% (w/v) milk for 90min at room temperature  
190 (RT). Incubation with the primary antibody was carried out in blocking solution (TBS-T  
191 5% milk) overnight at 4°C. For this assay, the following antibodies were used: anti-AKT  
192 (1:5000, Abcam, 179463) and anti-p-AKT (1:5000, Abcam, 222489).

193 The next day, the membranes were washed 3 times with PBS. They were then incubated  
194 with the secondary antibody in a blocking solution for 1 hour at RT. Goat anti-rabbit IgG  
195 H&L (HRP) (Abcam, 205718) was used as a secondary antibody in this assay at 1:5000  
196 for p-AKT and 1:10000 for AKT.

197 Finally, Clarity western ECL substrate (Biorad, Hercules, USA) was used to develop the  
198 membranes. The photos were taken by exposure on the ChemiDoc system (Biorad,  
199 Hercules, USA) after 5 minutes of incubation with the substrate. Quantification of bands  
200 was carried on Image Lab software (Biorad, Hercules, USA) using the method of total  
201 protein.

## 202 **Fluorescent preparations:**

203  $2 \times 10^4$  HeLa cells (WT and *ALMS1* KO) were seeded in  $\mu$ -Slide 8-well chambers (IBIDI,  
204 Germany). After 24 hours cells were transfected with pcDNA3 GFP-PTEN using  
205 Lipofectamine 3000 (Thermo Fisher, Waltham, USA) following the manufacturer's  
206 protocol. Cells were incubated overnight at 37°C with 5% CO<sub>2</sub>. The following day, the  
207 medium was changed by adding DMEM 2% P/S and 2%FBS. In addition, rhTGF- $\beta$  was  
208 added to the corresponding wells at a final concentration of 2ng/mL and the plates were  
209 incubated again overnight under the same conditions. Finally, on the fourth day, the  
210 preparations were marked, fixed and mounted, following the protocol detailed below.

211 200 $\mu$ L of DMEM medium per well containing CellMask (Thermo Fisher, Waltham, USA)  
212 at a 1:1000 dilution were added and incubated for 10min at 37°C in the dark. After two  
213 washes with PBS, the cells were fixed with 150  $\mu$ L of 4% paraformaldehyde (PFA) in a  
214 1:10 dilution of DMEM medium and incubated for 10min. The PFA diluted in DMEM was  
215 removed with 2 washes with PBS and 200  $\mu$ L of PBS with DAPI was added at a final  
216 concentration of 1 $\mu$ g/mL, followed by a 20min incubation in the dark. Finally, the wells  
217 were washed 3 times with PBS to remove the DAPI solution and the samples were  
218 mounted with 3 drops of Prolong. After incubation for 1 hour at 4°C, the samples were  
219 analysed on the Nikon NIE microscope. (Nikon, Tokyo, Japan).

220 This experiment was performed in duplicate on 2 alternate days adding 2 wells in each  
221 experiment for each treatment and cell line (WT and KO).



222 GFP-PTEN was a gift from Alonzo Ross (Addgene plasmid # 13039;  
223 <http://n2t.net/addgene:13039>; RRID: Addgene\_13039)

## 224 **Image acquisition, processing and analysis:**

225 The images were taken with the Nikon NIE direct microscope at 20X, using the RGB  
226 channels for the acquisition of DAPI (Blue), GFP-PTEN with FITC (Green) and CellMask  
227 with TRITC (Red). After that, all the images were processed with Fiji (Java 8 version)  
228 (Schindelin et al., 2012). The background was subtracted from all images, the resolution  
229 was set to 4908x3264 (0.25microns/pixel) and the RGB channels were grouped with the  
230 "Merge Channels" option to create the compositions, maintaining the independence of  
231 the channels. Cell segmentation was then performed using the biodock platform  
232 (<https://www.biodock.ai/>). Cells were filtered by size to remove any debris that could  
233 have been detected as cells by the algorithm. Finally, the signal from the 550 cells with  
234 the highest GFP intensity was normalised against the mean of TGF- $\beta$  stimulated control  
235 to obtain the normalised fluorescence values.

## 236 **Statistical analysis:**

237 The proteomic study involved several statistical analyses and data transformations. The  
238 data were first normalized using a variance stabilisation procedure (VSN). Data  
239 imputation for missing values was carried out using the Minprob approach with a q-  
240 value of less than 0.01. Finally, differential expression analysis was performed using the  
241 linear protein models of the limma package (Ritchie et al., 2015) included in the DEP R  
242 package (Zhang et al., 2018).

243 Transcriptomic normalisation and analysis were performed using DESeq2 (Love et al.,  
244 2014). An FDR value < 0.05 was used to determine differentially expressed genes.

245 To analyse statistical differences in the Western blot data, a t-student with a Benjamini,  
246 Krieger, & Yekutieli two-stage correlation was used. Finally, the fluorescence imaging  
247 results were analysed with a 2-way ANOVA.

248

## 249 RESULTS:

### 250 Inhibition of *ALMS1* gene expression causes several alterations 251 of the transcriptome and proteome:

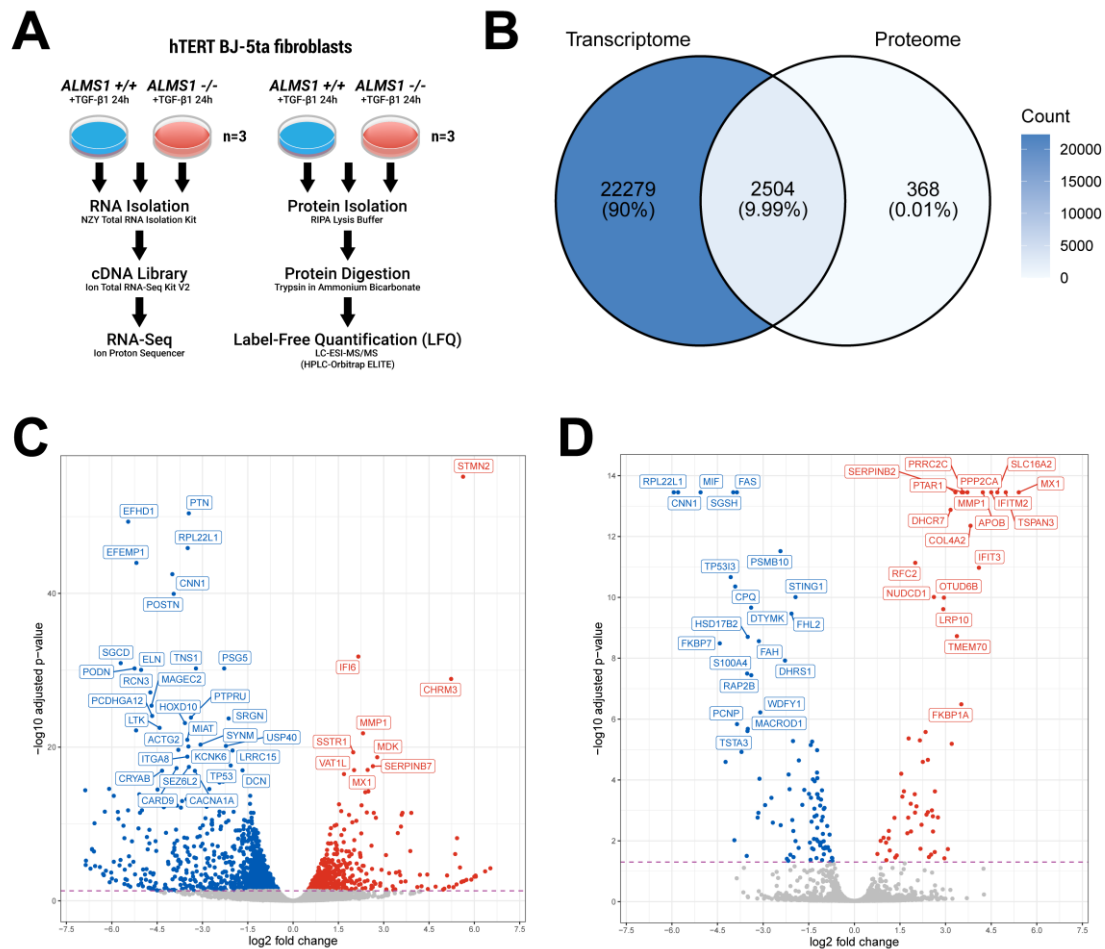

252

253 **Figure 1.** Differential expression analysis in the BJ-5ta *ALMS1* knockout cell line by RNA-seq and  
254 LFQ-proteomics. **(A)** Illustration of the experimental design and procedure followed in this study.  
255 **(B)** Total overlap between genes identified in the transcriptome and the proteome. **(C)** Volcano-  
256 plot of differentially expressed genes (FDR < 0.05) in RNA-seq, highlighting the 40 most  
257 significant genes. **(D)** Volcano-plot of differentially expressed proteins (FDR < 0.05) in the  
258 proteome, highlighting the 40 most significant protein-coding genes.

259 In this study, we generated a multi-omics dataset (total RNA-seq and LFQ-proteomic  
260 analysis) on an hTERT fibroblast cell line (WT/CT and *ALMS1* KO). This cell line was

261 previously stimulated with TGF- $\beta$ 1 ligand to identify alterations related with TGF- $\beta$   
262 pathway (**Figure 1A**).

263 We identified 24,784 genes (transcripts with distinct gene symbols) in the transcriptome  
264 (**Figure 1B, Table S1**). On the other hand, we identified 2,872 proteins in the proteome,  
265 of which 1,884 were quantified in the 6 study samples (3WT and 3KO) (**Figure 1B, Figure**  
266 **S2A, B, Table S2**). Of the proteins identified, 2,504 could be unambiguously associated  
267 with a gene. These protein-coding genes (PCG) identified in the proteome covered 10%  
268 of the total number of genes identified in the transcriptome (**Figure 1B**).

269 Our expression analysis (*ALMS1* KO vs WT) revealed a total of 1,712 differentially  
270 expressed genes (DEG) and 158 differentially expressed proteins (DEG) (FDR < 0.05;  
271 **Figure 1C, D**). Although the number of DEG detected in the proteome was 10 times  
272 lower than in the transcriptome, a similar gene expression profile was observed in both  
273 data sets (**Figure 1C, D**). Hence, despite the different resolution of these techniques,  
274 they are consistent with each other (**Figure 1B**).

275

276 RNA-seq profiling of *ALMS1*-deficient BJ-5ta cells reveals  
 277 different pathways related to extracellular matrix regulation:

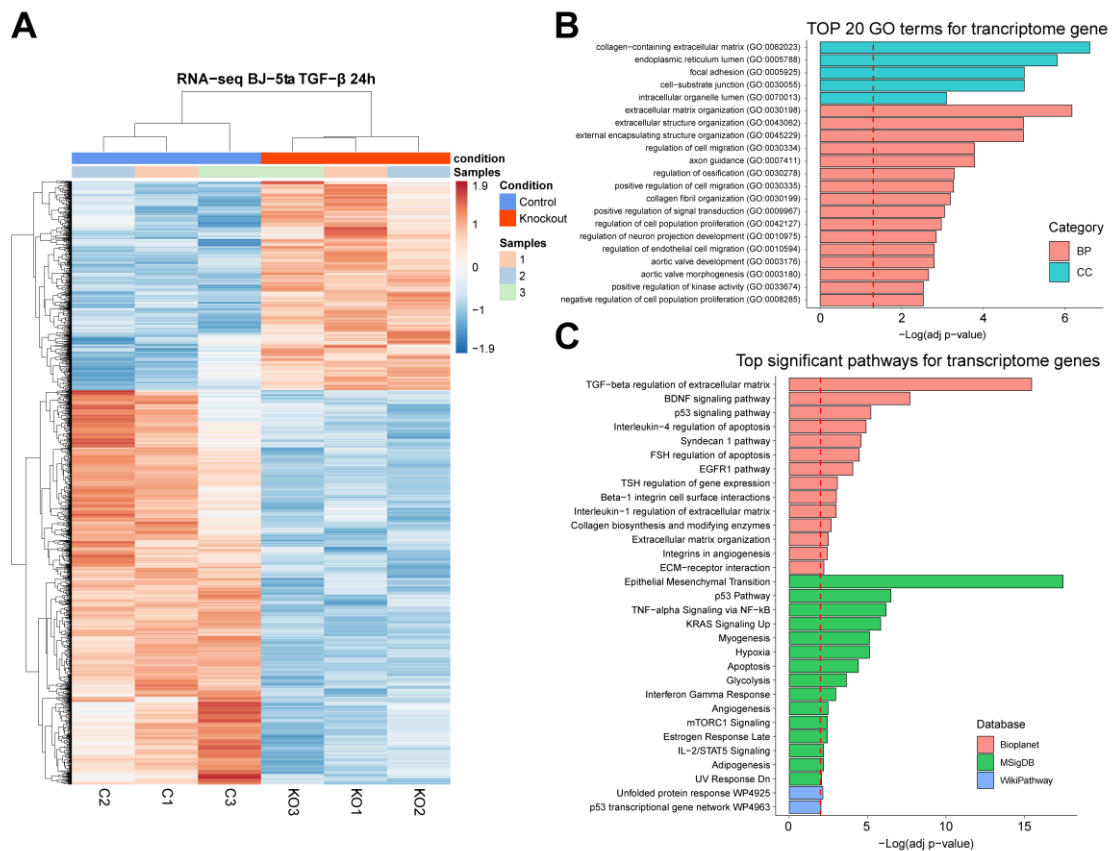

278

279 **Figure 2.** RNA-seq expression profile and enrichment analysis in the *ALMS1* knockout cell line  
 280 (hTERT-BJ-5ta). **(A)** Heatmap of the 1,712 differentially expressed genes with FDR < 0.05 in the  
 281 hTERT-BJ-5ta cell line after 24 hours with TGF- $\beta$  pathway stimulation **(B)** The 20 most statistically  
 282 significant GO terms detected after over-representation analysis (ORA) in the transcriptome. BP:  
 283 biological process; CC: cellular Component **(C)** Signalling pathways significantly enriched (ORA,  
 284 FDR < 0.01) for transcriptomic data in Bioplanet, KEGG, MSigDB and Wikipathway databases.

285 In the transcriptome, of 1,712 DEG, 1,119 (65%) were under-expressed and 593 (35%)  
 286 were over-expressed in the *ALMS1* KO cell line compared to controls **(Figure 2A; Table**  
 287 **S1).**

288 To determine the processes affected by inhibition of *ALMS1* gene expression in the  
 289 transcriptome, we performed an over-representation analysis (ORA) **(Table S3)**. DEGs  
 290 were not filtered by fold change (FC) due to the additive effect of small FCs along a  
 291 signalling pathway **(Methods)**.

292 We found changes in the gene expression profile of *ALMS1* KO cell line in pathways  
293 related to extracellular matrix (ECM) regulation through TGF- $\beta$ , the Epithelial  
294 Mesenchyme Transition (EMT) and various pathways that cross-signal with the TGF- $\beta$   
295 pathway (BDNF, p53, TNF- $\alpha$ , EGFR1, KRAS and mTORC1) (**Figure 2B, C**).

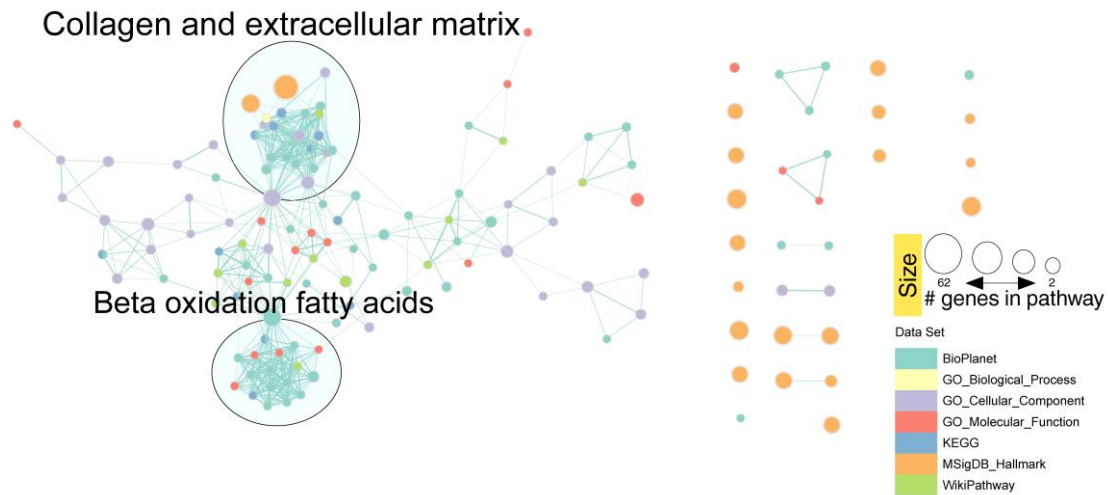

296

297 **Figure 3.** Network clustering of transcriptomic GO terms and enriched routes in the different  
298 databases after applying the Markov clustering algorithm (MCL).

299 Next, we constructed a network using EnrichmentMap (Merico et al., 2010) to reduce  
300 the redundancy of pathways and processes between the different databases used in the  
301 previous analysis. For this, only enrichR terms with an FDR < 0.05 were used (**Methods**).  
302 In this network, we found two main clusters, highly connected to each other,  
303 incorporating pathways from different databases. The most representative keywords in  
304 these clusters pointed towards collagen and ECM regulation and  $\beta$ -oxidation of fatty  
305 acids (**Figure 3**).

306

307 **Proteomic profiling of *ALMS1*-deficient BJ-5ta cells suggests**  
 308 **alterations in intracellular organelles lumen and lipid**  
 309 **metabolism:**

310 To study whether the observed differences in gene expression profile are replicated at  
 311 the protein level, we performed the same analysis on the proteome (**Table S2**). Of 158  
 312 DEG, 98 (62%) were under-expressed and 60 (38%) were over-expressed in the *ALMS1*  
 313 KO cell line (**Figure 4A**).

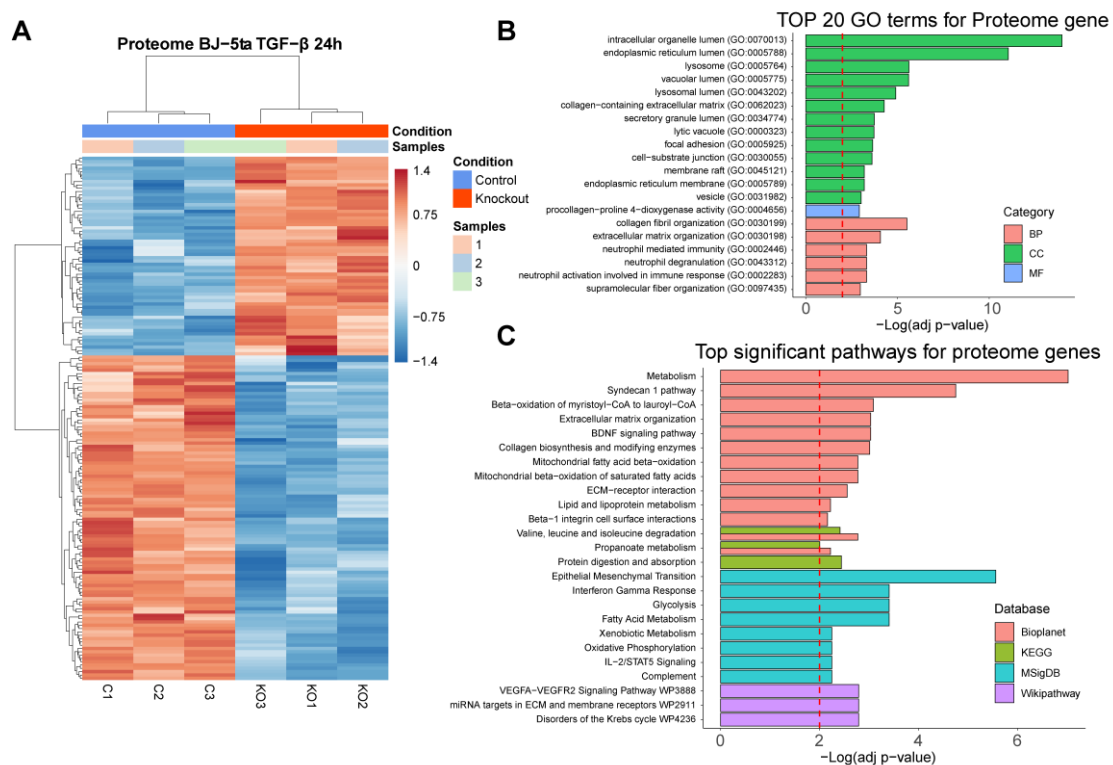

314  
 315 **Figure 4.** Protein expression profiling and enrichment analysis of *ALMS1* knockout cell line  
 316 (hTERT-BJ-5ta). **(A)** Heatmap of the 158 differentially expressed protein coding genes with FDR  
 317 < 0.05 in the hTERT-BJ-5ta cell line after 24 hours with TGF- $\beta$  pathway stimulation **(B)** The 20  
 318 most statistically significant GO terms detected after over-representation analysis (ORA) in the  
 319 proteome. BP: biological process; CC: cellular Component; MF: molecular function **(C)** Signalling  
 320 pathways significantly enriched (ORA, FDR < 0.01) for proteomic data in Bioplanet, KEGG,  
 321 MSigDB and Wikipathway databases.

322 We performed an ORA to establish the proteome-enriched pathways and GOterms  
 323 (**Table S4**). The proteome GO terms suggested that depletion of *ALMS1* gene affects the

324 endoplasmic reticulum, lysosomes, focal adhesion and the organisation of collagen and  
325 ECM regulation (**Figure 4B**). These results are consistent with transcriptome findings,  
326 including BDNF, Syndecan-1 signalling pathways and EMT (**Figure 4C**). In addition, other  
327 enriched proteomic pathways involved in metabolic processes such as  $\beta$ -oxidation of  
328 fatty acids in mitochondria were also detected (**Figure 4C**).

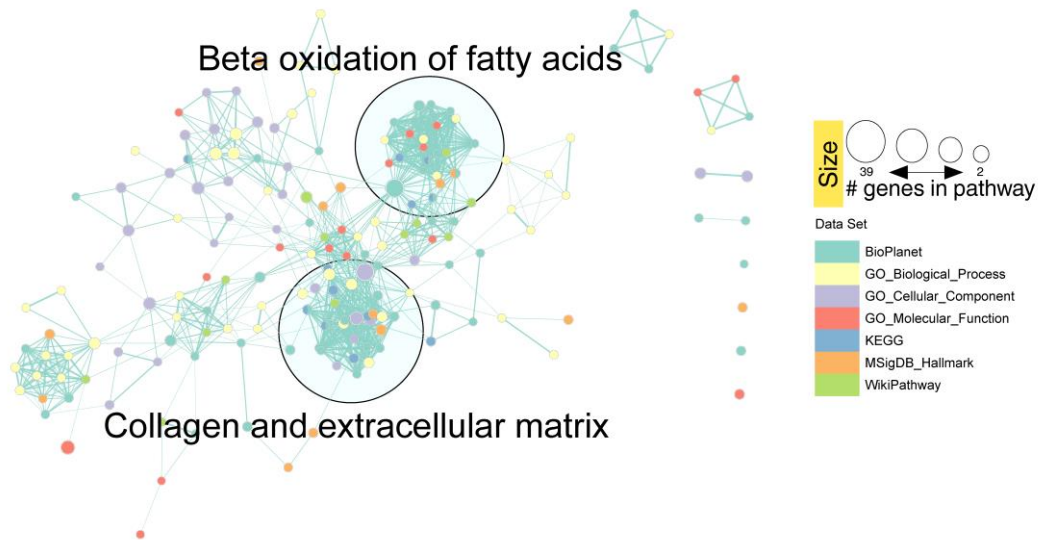

329

330 **Figure 5.** Network clustering of proteomic GO terms and enriched routes in the different  
331 databases after applying the Markov clustering algorithm (MCL).

332 Regarding the reduction of redundancy between the databases used for the enrichment  
333 analysis, we applied the same methodology as in the previous case, obtaining consistent  
334 results with the transcriptome. We found two main clusters, associated with collagen  
335 and ECM regulation and  $\beta$ -oxidation of fatty acids (**Figure 5**).

336



337 **The multi-omics analysis highlights the association of ALMS1**  
 338 **with the endoplasmic reticulum, Syndecan-1 pathway and EMT:**

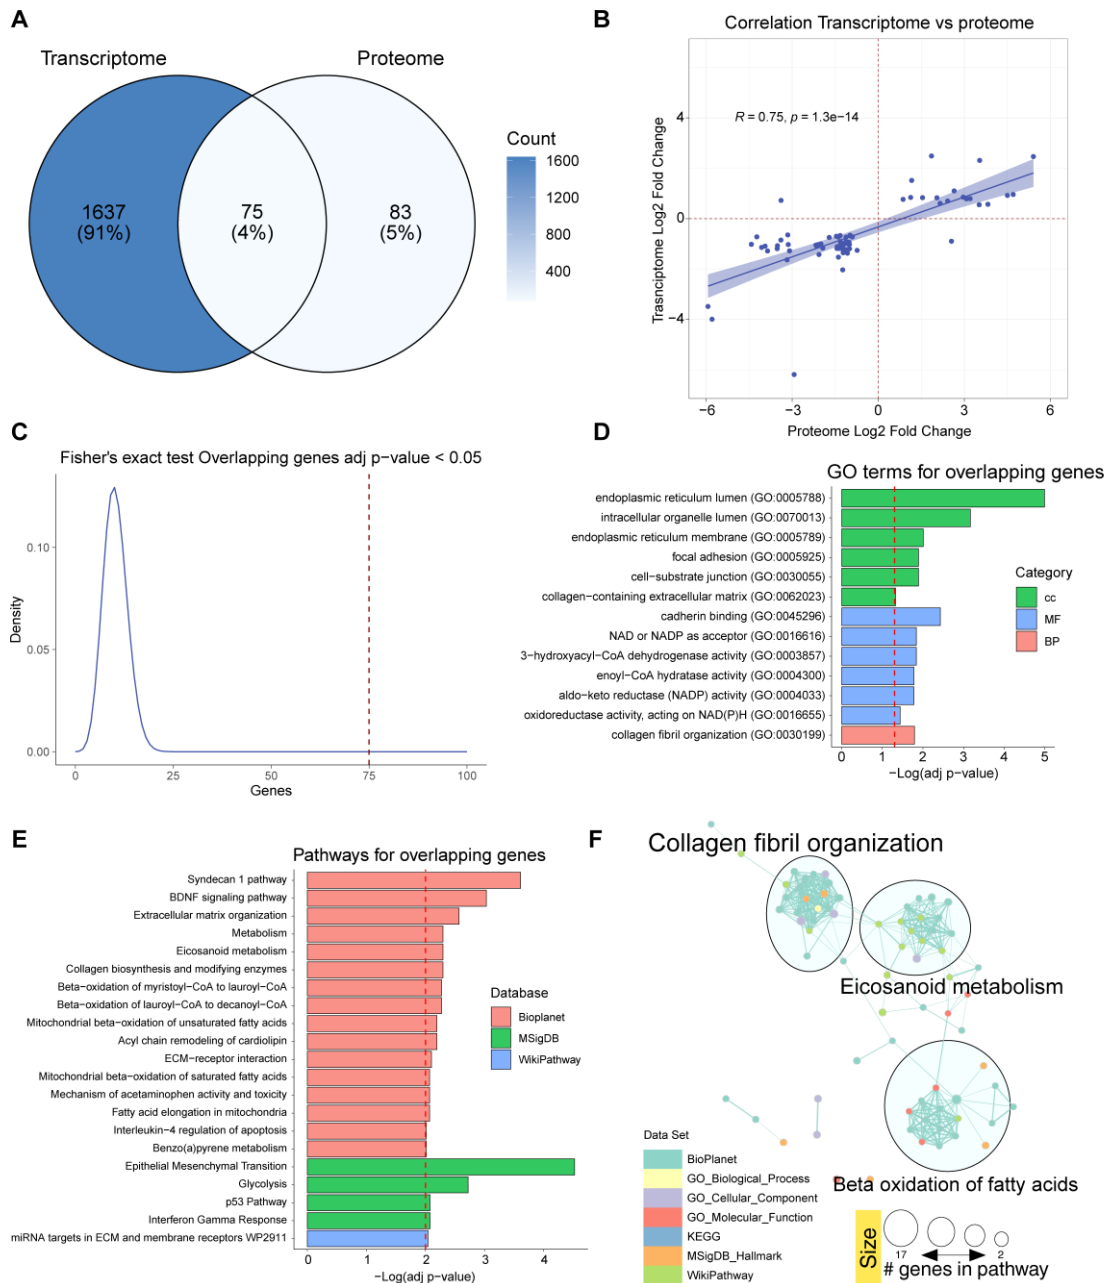

339

340 **Figure 6.** Analysis of differentially expressed genes overlapping between transcriptome and  
 341 proteome. **(A)** Venn diagram with differentially expressed genes in the transcriptome and  
 342 proteome and matching terms in both datasets. **(B)** Correlation plot between Log2 FCs in the  
 343 transcriptome and the proteome of the matched terms. **(C)** Fisher's exact test to evaluate the  
 344 probability of obtaining 75 or more matched genes. **(D)** Significantly over-represented (ORA, FDR  
 345  $< 0.05$ ) GO terms that are associated with the subset of matched data. **(E)** Significantly over-



346 represented pathways (ORA, FDR < 0.01) in the list of overlapping genes **(F)**. Network clustering  
347 of GO terms and pathways in the different bases of the overlapping gene data after applying the  
348 Markov clustering algorithm (MCL).

349 To investigate the relationship between the transcriptome and proteome, we analysed  
350 the overlap of DEG between them (1,712 genes and 158 proteins). This resulted in 75  
351 DEG in the *ALMS1* KO cell line **(Figure 6A; Table S5)** with a Pearson correlation of 0.75  
352 (p-value  $1.3 \times 10^{-14}$ ) between the FCs of the transcriptome and proteome **(Figure 6B)**.  
353 Importantly, the likelihood of finding by chance 75 or more common DEG between the  
354 transcriptome and proteome is practically zero (Fisher's exact test). Thus, these genes  
355 are a valid signature of *ALMS1* depletion **(Figure 6C)**.

356 Further, their enrichment analysis highlights the role of *ALMS1* in the endoplasmic  
357 reticulum, BDNF or Syndecan 1 pathways, EMT and lipid-associated signalling pathways  
358 such as fatty acid metabolism **(Figure 6D, E; Table S6)**. This time, the enriched pathway  
359 reduction analysis identified three clusters, one cluster agglutinated the alterations of  
360 the ECM, another the alterations of the  $\beta$ -oxidation of fatty acids and the third cluster  
361 highlighted the metabolism of eicosanoids, which also affects lipid metabolism **(Figure**  
362 **6F)**.

### 363 ***ALMS1* depletion affects the signalling cross-talk between TGF- $\beta$** 364 **and PI3K/AKT:**

365 *ALMS1* depletion does not appear to affect the activation of the canonical TGF- $\beta$   
366 pathway in all cell types (Bea-Mascato et al., 2022) so the observed alterations could be  
367 due to aberrant signalling of non-canonical pathways such as PI3K/AKT. The PI3K/AKT  
368 pathway regulates many of the altered processes found in our analyses. This pathway is  
369 involved in control of cell migration, proliferation and adhesion (Xu et al., 2015; Yu and  
370 Cui, 2016) as well as in cell metabolism (Yu and Cui, 2016; Hoxhaj and Manning, 2019).  
371 Given the present results, we decided to study the cross-signalling between the TGF- $\beta$   
372 and PI3K/AKT pathway in our *ALMS1*-deficient fibroblast line.

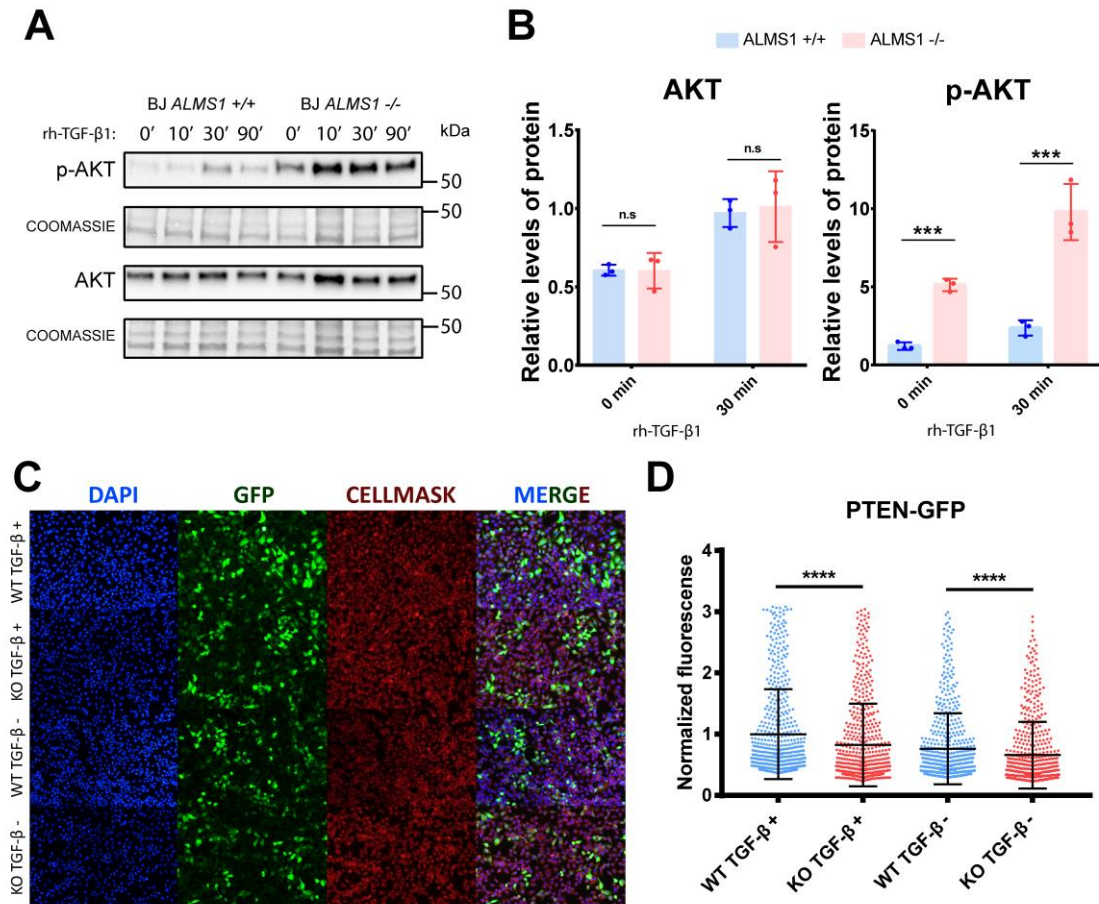

373

374 **Figure 7.** Study of cross-signalling between TGF-β and AKT pathways in ALMS1KO cell models.  
 375 **(A)** Representative Western blot of AKT overactivation after TGF-β pathway stimulation in BJ-  
 376 5ta. **(B)** Quantification of AKT protein expression and p-AKT activation levels normalised against  
 377 Coomassie staining in BJ-5ta. **(C)** Representative images of fluorescence labelling of HeLa cells  
 378 after transfection with GFP-tagged PTEN. **(D)** Normalised fluorescence of the 550 most  
 379 fluorescent HeLa cells in each preparation.

380 For this purpose, AKT protein phosphorylation levels were measured in the hTERT-BJ-  
 381 5ta *ALMS1* KO cell line by Western blot at four different stimulation times with TGF-β1  
 382 ligand (0, 10, 30 and 90 min). Indeed, deficiency of *ALMS1* generates an over-activation  
 383 of the AKT pathway (**Figure 7A, B**). This over-activation was present at basal level (time  
 384 0), but was exacerbated by TGF-β stimulation, with the differentials between ALMS1KO  
 385 and WT being most notable in AKT after 30min of TGF-β1 stimulation (**Figure 7A, B**).

386 We thus hypothesised that over-activation of the AKT pathway results from the  
 387 accumulation of membrane phospholipids such as PIP3, which is the substrate for the

388 activation of PI3K and subsequently AKT. The PTEN protein is responsible for  
389 dephosphorylating PIP3 to PIP2 which inhibits the AKT pathway. For this reason, the  
390 PTEN inhibition could be a cause of the AKT over-activation. To test this hypothesis, we  
391 transfected a KO model for the *ALMS1* gene in the HeLa cell line with a plasmid to  
392 express PTEN protein fused to GFP. We observed a significant reduction of GFP  
393 fluorescence in the KO cells compared with controls in both untreated and TGF- $\beta$  ligand-  
394 treated cells (p-value < 0.0001). This suggests that *ALMS1* depletion affects PTEN  
395 expression. Moreover, this inhibition seems to be slightly accentuated (p-value < 0.01)  
396 after TGF- $\beta$  stimulation (**Figure 7C, D**).

397

## 398 **DISCUSSION:**

399 While the role of the centrosome in the control of the mitotic cycle has been very well  
400 studied, little is known about its structure and functions in other contexts (Doxsey et al.,  
401 2005; Bettencourt-Dias and Glover, 2007; Conduit et al., 2015). The study of different  
402 mutated centrosomal proteins and their impact on processes of the primary cilium, such  
403 as ciliogenesis, endocytosis or the signalling of various pathways such as WNT, SHh or  
404 TGF- $\beta$ , has however been enlightening (Kobayashi and Dynlacht, 2011; Collin et al.,  
405 2012; Hehnlly et al., 2012; Leitch et al., 2014; Mönnich et al., 2018; Gonçalves et al.,  
406 2021). Despite all this, many of the regulatory aspects of how centrosomal proteins  
407 coordinate these processes remain unknown.

408 The TGF- $\beta$  signalling is one of the main pathways regulated through the primary cilium  
409 (Clement et al., 2013). It is involved in normal development in mammals and influences  
410 other pathways by cross-signalling such as p53, MAPKs or PI3K/AKT (Rahimi and Leof,  
411 2007; Patel et al., 2019; Finnson et al., 2020). For this reason, it is timely to determine  
412 the role of different ciliary and basal body genes, such as *ALMS1*, in their regulation.

413 Thus, we further explored the previously described association between *ALMS1*  
414 deficiency and alterations in TGF- $\beta$ -mediated signal transduction (Álvarez-Satta et al.,  
415 2021; Bea-Mascato et al., 2022). We performed gene expression profiling by RNA-seq  
416 and LFQ-proteomics in an *ALMS1*KO hTERT-BJ-5ta cell line stimulated with TGF- $\beta$ 1. This  
417 cellular model was previously generated and characterised in our lab (Bea-Mascato et  
418 al., 2022). We found that the lack of *ALMS1* generates an inhibited gene expression  
419 profile after TGF- $\beta$ 1 stimulation, both in the transcriptome and proteome (**Figure 2A;**  
420 **4A**). This gene expression profile is consistent with our previously described proteomic  
421 results in HeLa and with the basal gene expression profile described in patient  
422 fibroblasts (Zulato et al., 2011; Bea-Mascato et al., 2022). This means that the lack of  
423 *ALMS1* is likely to have an inhibitory impact on most of the processes controlled  
424 downstream of this gene, such as mitosis, cell migration or receptor recycling. (Zulato et  
425 al., 2011; Leitch et al., 2014; Shenje et al., 2014; Bea-Mascato et al., 2022).

426 The ORA of transcriptome revealed alterations in the TGF- $\beta$  signalling pathway and other  
427 tangentially regulated pathways such as mTOR, EGFR or p53 and processes such as ECM

428 regulation or EMT (**Figure 2B, C**). The existence of this cross-signalling is known,  
429 however, this is the first time that the impact of ALMS1 depletion on it has been shown,  
430 which could open up new avenues of treatment for ALMS patients. (Kato et al., 2009;  
431 Hamidi et al., 2017; Patel et al., 2019). On the other hand, It was previously established,  
432 that ALMS1 depletion led to aberrant expression of several TGF- $\beta$ 1-induced EMT  
433 markers in HeLa and hTERT-BJ-5ta cells (Bea-Mascato et al., 2022). However, these  
434 results further establish the connection between ALMS1 depletion and EMT alterations.  
435 EMT inhibition supports the poor migration capacity of cells lacking ALMS1 which may  
436 be due to cytoskeleton collapse, another event described in cells lacking ALMS1 (Zulato  
437 et al., 2011; Collin et al., 2012; Bea-Mascato et al., 2022).

438 Downstream activation of the TGF- $\beta$  pathway can follow *via* the canonical pathway,  
439 dependent on SMADs (SMAD2 and SMAD3), or non-canonical, which encompasses a  
440 plethora of pathways such as MAPKs, ERKs, p53, or PI3K/AKT (Finnson et al., 2020). For  
441 this reason, alterations in cross-signalling pathways such as mTORC1, EGFR1 or p53  
442 detected in the transcriptome show that alterations in TGF- $\beta$  are mainly related to the  
443 non-canonical part of this pathway (**Figure 2C**) (Patel et al., 2019; Finnson et al., 2020).

444 Our proteomic analysis revealed proteins involved in lipid metabolism and cytoplasmic  
445 organelles such as the endoplasmic reticulum, mitochondria, or lysosomes (**Figure 4B,**  
446 **C**). We have previously described that ALMS1 depletion does impact cell viability due to  
447 changes in mitochondrial reduction capacity (Bea-Mascato et al., 2022). However, it  
448 appears to affect mitochondrial  $\beta$ -oxidation of fatty acids (**Figure 4C**). This could connect  
449 the absence of ALMS1 to oxidative metabolism disorders (Liu and Desai, 2015). In  
450 addition, alterations in cytoplasmic organelles, such as the endoplasmic reticulum and  
451 lysosomes, could be related to alterations in endocytosis, receptor recycling or  
452 autophagy. ALMS1 absence has been linked to alterations in transferrin (TfR), NOTCH  
453 and NKCC2 receptor recycling, but its role in TGF- $\beta$  receptor recycling or autophagy has  
454 not yet been established (Collin et al., 2012; Leitch et al., 2014; Jaykumar et al., 2018;  
455 Yang et al., 2020).

456 Indeed, after applying a redundancy reduction analysis of enriched pathways, we found  
457 that ALMS1 regulates two main clusters in the transcriptome and proteome; processes  
458 related to the regulation of the ECM and processes related to lipid metabolism such as

459  $\beta$ -oxidation of fatty acids (**Figure 3; 5**). It has already been described that deletion of  
460 *ALMS1* leads to overexpression of several ECM components in fibroblasts from ALMS  
461 patients. For this reason, understanding these alterations is key to determining the  
462 pathophysiology of fibrosis in ALMS (Zulato et al., 2011). On the other hand, the  
463 metabolic alterations observed in ALMS could have their origin in processes such as  $\beta$ -  
464 oxidation of fatty acids (Romano et al., 2008; Huang-Doran and Semple, 2010; Favaretto  
465 et al., 2014; Geberhiwot et al., 2021).

466 The list of common differentially expressed genes between the transcriptome and  
467 proteome supports the above findings, indicating that *ALMS1* depletion affects EMT,  
468 endoplasmic reticulum, Syndecan-1 and BDNF signalling pathways and lipid metabolism  
469 pathways such as  $\beta$ -oxidation of fatty acids (**Figure 6D, E**) (Kasza et al., 2014). By studying  
470 this list of genes by redundancy reduction analysis, we saw the existence of a link  
471 between *ALMS1* depletion and eicosanoid metabolism in addition to the processes  
472 mentioned above (**Figure 6F**). Alterations related to the ECM are undoubtedly key to the  
473 appearance of fibrosis in these patients; however, alterations in the  $\beta$ -oxidation of fatty  
474 acids, beyond their link to obesity, may contribute to the appearance of fibrotic tissue  
475 due to lipid deposits (Serra et al., 2013; Kang et al., 2014). This suggest that the  
476 metabolic disorder in patients with ALMS is involved in the progressive development of  
477 fibrosis in various organs such as the kidneys and liver (Bettini et al., 2021).

478 Regarding the deregulation of the PI3K/AKT, we can relate the over-activation of AKT  
479 (**Figure 7A, B**) with the inhibition of the p53 pathway (**Figure 1C**) (Gottlieb et al., 2002;  
480 Abraham and O'Neill, 2014). This is supported by the decrease in the expression of the  
481 *PTEN* gene, which could explain an over-phosphorylation of the cell membrane and an  
482 accumulation of PIP3 leading to the over-activation of AKT (**Figure 7C, D**) (Álvarez-Garcia  
483 et al., 2019). To our knowledge, this is the first study to explore how *ALMS1* affects cross-  
484 signalling between AKT and the TGF- $\beta$  pathway. Other studies have been carried out to  
485 try to understand the role of *ALMS1* in regulating the insulin mediated AKT pathway.  
486 The involvement of AKT has not yet been clearly established in ALMS, while some studies  
487 in pre-adipocytes have not detected any differences in AKT activation, other studies in  
488 mice have shown that AKT is over-activated in some tissues and it is inhibited in others,  
489 when *ALMS1* is depleted (Huang-Doran and Semple, 2010; Favaretto et al., 2014;



490 Geberhiwot et al., 2021). AKT regulation is tissue specific, it has 3 distinct isoforms and  
491 each has multiple phosphorylation sites (Liao and Hung, 2010). This could be an  
492 explanation for the disparity of the data present in the bibliography.

493 The over-activation of the AKT pathway could be the link between alterations at the  
494 metabolic level and alterations related to the ECM. The inhibition of p53 would be  
495 caused by this over-activation through MDM2, affecting the PTEN-p53-AKT-MDM2 loop  
496 (Gottlieb et al., 2002; Abraham and O'Neill, 2014). This hypothesis would be supported  
497 by the resistance to apoptosis in *ALMS1*-depleted cells (Zulato et al., 2011; Bea-Mascato  
498 et al., 2022).

## 499 **CONCLUSION:**

500 In conclusion, the lack of *ALMS1* gene expression alters the TGF- $\beta$  pathway in the  
501 knockout cell model. It also seems to compromise the signalling of other tangential  
502 pathways such as PI3K/AKT or p53. These signalling alterations appear to affect diverse  
503 metabolic processes involving the mitochondrial, endoplasmic reticulum and lysosomes  
504 and various lipid-mediated signalling pathways. The alterations are mainly clustered into  
505 processes affecting the regulation of the ECM and the  $\beta$ -oxidation of fatty acids, which  
506 we confirmed in both the transcriptome and proteome. Finally, *ALMS1* depletion led to  
507 over-activation of the AKT protein in BJ-5ta cells and inhibition of the PTEN protein in  
508 HeLa cells.

509 **Author Contributions:** BB-M, DV designed the study. BB-M performed the experiments.  
510 EG-C, YS-C and SC assisted with RNA-seq analysis and data integration. All authors wrote  
511 the manuscript and provided approval for publication.

512 **Funding:** This work was funded by Instituto de Salud Carlos III de Madrid FIS project  
513 PI15/00049 and PI19/00332, Xunta de Galicia (Centro de Investigación de Galicia CINBIO  
514 2019-2022) Ref. ED431G-2019/06, Consolidación e estruturación de unidades de  
515 investigación competitivas e outras accións de fomento (ED431C-2018/54). Brais Bea-  
516 Mascato (FPU17/01567) was supported by graduate studentship awards (FPU  
517 predoctoral fellowship) from the Spanish Ministry of Education, Culture and Sports. We  
518 thank the NIHR GOSH BRC for its support (to YE S-C and SC).

519 **Informed Consent Statement:** Not Apply.

520 **Data Availability Statement:** Data are available via Gene Expression Omnibus (GEO)  
521 with the identifier GSE209844 and ProteomeXchange with the identifier PXD035708.

522 **Code Availability Statement:** The code used in this study can be accessed at the GitHub  
523 address "[https://github.com/BreisOne/multiomic\\_pipeline](https://github.com/BreisOne/multiomic_pipeline)".

524 **Acknowledgements:** We sincerely thank the Proteomics and Genomics services from  
525 Centro de Apoyo Científico-Tecnológico a la Investigación (CACTI) of University of Vigo  
526 and its specialists Paula Álvarez Chaver, Ángel Sebastián Comesaña, Verónica Outeiriño  
527 and Manuel Marcos for their guidance and advise. We also thank Mercedes Peleteiro  
528 Olmedo from Centro de Investigaci3n Biomédicas (CINBIO) from University of Vigo for  
529 the flow cytometry service.

530 **Conflicts of Interest:** The authors declare no conflict of interest. The funders had no role  
531 in the design of the study; in the collection, analyses, or interpretation of data; in the  
532 writing of the manuscript, or in the decision to publish the results.

533



## 534 REFERENCES:

- 535 Abraham, A. G., and O'Neill, E. (2014). PI3K/Akt-mediated regulation of p53 in cancer.  
536 *Biochem. Soc. Trans.* 42, 798–803. doi: 10.1042/BST20140070.
- 537 Álvarez-García, V., Tawil, Y., Wise, H. M., and Leslie, N. R. (2019). Mechanisms of PTEN  
538 loss in cancer: It's all about diversity. *Semin. Cancer Biol.* 59, 66–79. doi:  
539 10.1016/J.SEMCANCER.2019.02.001.
- 540 Álvarez-Satta, M., Lago-Docampo, M., Bea-Mascato, B., Solarat, C., Castro-Sánchez, S.,  
541 Christensen, S. T., et al. (2021). ALMS1 Regulates TGF- $\beta$  Signaling and Morphology  
542 of Primary Cilia. *Front. Cell Dev. Biol.* 9, 112. Available at:  
543 <https://www.frontiersin.org/article/10.3389/fcell.2021.623829>.
- 544 Anders, S., Pyl, P. T., and Huber, W. (2015). HTSeq—a Python framework to work with  
545 high-throughput sequencing data. *Bioinformatics* 31, 166–169. doi:  
546 10.1093/bioinformatics/btu638.
- 547 Anvarian, Z., Mykytyn, K., Mukhopadhyay, S., Pedersen, L. B., and Christensen, S. T.  
548 (2019). Cellular signalling by primary cilia in development, organ function and  
549 disease. *Nat. Rev. Nephrol.* 15, 199–219. doi: 10.1038/s41581-019-0116-9.
- 550 Barrett, T., Wilhite, S. E., Ledoux, P., Evangelista, C., Kim, I. F., Tomashevsky, M., et al.  
551 (2013). NCBI GEO: archive for functional genomics data sets—update. *Nucleic Acids*  
552 *Res.* 41, D991. doi: 10.1093/NAR/GKS1193.
- 553 Bea-Mascato, B., Neira-Goyanes, E., Iglesias-Rodríguez, A., and Valverde, D. (2022).  
554 Depletion of ALMS1 affects TGF- $\beta$  signalling pathway and downstream processes  
555 such as cell migration and adhesion capacity. *Front. Mol. Biosci.* 0, 1085. doi:  
556 10.1101/2021.12.19.473196.
- 557 Bettencourt-Dias, M., and Glover, D. M. (2007). Centrosome biogenesis and function:  
558 centrosomics brings new understanding. *Nat. Rev. Mol. Cell Biol.* 8, 451–463. doi:  
559 10.1038/NRM2180.
- 560 Bettini, S., Bombonato, G., Dassie, F., Favaretto, F., Piffer, L., Bizzotto, P., et al. (2021).  
561 Liver Fibrosis and Steatosis in Alström Syndrome: A Genetic Model for Metabolic

- 562 Syndrome. *Diagnostics* 2021, Vol. 11, Page 797 11, 797. doi:  
563 10.3390/DIAGNOSTICS11050797.
- 564 Chen, J.-H., Geberhiwot, T., Barrett, T. G., Paisey, R., and Semple, R. K. (2017). Refining  
565 genotype-phenotype correlation in Alström syndrome through study of primary  
566 human fibroblasts. *Mol. Genet. genomic Med.* 5, 390–404. doi: 10.1002/mgg3.296.
- 567 Christensen, S. T., Morthorst, S. K., Mogensen, J. B., and Pedersen, L. B. (2017). Primary  
568 Cilia and Coordination of Receptor Tyrosine Kinase (RTK) and Transforming Growth  
569 Factor  $\beta$  (TGF- $\beta$ ) Signaling. *Cold Spring Harb. Perspect. Biol.* 9, a028167. doi:  
570 10.1101/CSHPERSPECT.A028167.
- 571 Clement, C. A., Ajbrou, K. D., Koefoed, K., Vestergaard, M. L., Veland, I. R., Henriques de  
572 Jesus, M. P. R., et al. (2013). TGF- $\beta$  signaling is associated with endocytosis at the  
573 pocket region of the primary cilium. *Cell Rep.* 3, 1806–14. doi:  
574 10.1016/j.celrep.2013.05.020.
- 575 Collin, G. B., Cyr, E., Bronson, R., Marshall, J. D., Gifford, E. J., Hicks, W., et al. (2005).  
576 *Alms1*-disrupted mice recapitulate human Alström syndrome. *Hum. Mol. Genet.*  
577 14, 2323–2333. doi: 10.1093/hmg/ddi235.
- 578 Collin, G. B., Marshall, J. D., Ikeda, A., So, W. V., Russell-Eggitt, I., Maffei, P., et al. (2002).  
579 Mutations in *ALMS1* cause obesity, type 2 diabetes and neurosensory degeneration  
580 in Alström syndrome. *Nat. Genet.* 31, 74–8. doi: 10.1038/ng867.
- 581 Collin, G. B., Marshall, J. D., King, B. L., Milan, G., Maffei, P., Jagger, D. J., et al. (2012).  
582 The Alström syndrome protein, *ALMS1*, interacts with  $\alpha$ -actinin and components of  
583 the endosome recycling pathway. *PLoS One* 7, e37925–e37925. doi:  
584 10.1371/journal.pone.0037925.
- 585 Conduit, P. T., Wainman, A., and Raff, J. W. (2015). Centrosome function and assembly  
586 in animal cells. *Nat. Rev. Mol. Cell Biol.* 16, 611–624. doi: 10.1038/NRM4062.
- 587 Dobin, A., Davis, C. A., Schlesinger, F., Drenkow, J., Zaleski, C., Jha, S., et al. (2013). STAR:  
588 ultrafast universal RNA-seq aligner. *Bioinformatics* 29, 15–21. doi:  
589 10.1093/bioinformatics/bts635.

- 590 Doxsey, S., Zimmerman, W., and Mikule, K. (2005). Centrosome control of the cell cycle.  
591 *Trends Cell Biol.* 15, 303–311. doi: 10.1016/J.TCB.2005.04.008.
- 592 Ewels, P., Magnusson, M., Lundin, S., and Källér, M. (2016). MultiQC: summarize analysis  
593 results for multiple tools and samples in a single report. *Bioinformatics* 32, 3047–  
594 3048. doi: 10.1093/BIOINFORMATICS/BTW354.
- 595 Favaretto, F., Milan, G., Collin, G. B., Marshall, J. D., Stasi, F., Maffei, P., et al. (2014).  
596 GLUT4 Defects in Adipose Tissue Are Early Signs of Metabolic Alterations in  
597 Alms1GT/GT, a Mouse Model for Obesity and Insulin Resistance. *PLoS One* 9,  
598 e109540. doi: 10.1371/JOURNAL.PONE.0109540.
- 599 Finnson, K. W., Almadani, Y., and Philip, A. (2020). Non-canonical (non-SMAD2/3) TGF- $\beta$   
600 signaling in fibrosis: Mechanisms and targets. *Semin. Cell Dev. Biol.* 101, 115–122.  
601 doi: 10.1016/J.SEMCDB.2019.11.013.
- 602 Geberhiwot, T., Baig, S., Obringer, C., Girard, D., Dawson, C., Manolopoulos, K., et al.  
603 (2021). Relative Adipose Tissue Failure in Alström Syndrome Drives Obesity-  
604 Induced Insulin Resistance. *Diabetes* 70, 364–376. doi: 10.2337/DB20-0647.
- 605 Gonçalves, A. B., Hasselbalch, S. K., Joensen, B. B., Patzke, S., Martens, P., Ohlsen, S. K.,  
606 et al. (2021). CEP78 functions downstream of CEP350 to control biogenesis of  
607 primary cilia by negatively regulating CP110 levels. *Elife* 10. doi:  
608 10.7554/ELIFE.63731.
- 609 Gottlieb, T. M., Martinez Leal, J. F., Seger, R., Taya, Y., and Oren, M. (2002). Cross-talk  
610 between Akt, p53 and Mdm2: possible implications for the regulation of apoptosis.  
611 *Oncogene* 2002 218 21, 1299–1303. doi: 10.1038/sj.onc.1205181.
- 612 Graser, S., Stierhof, Y.-D., Lavoie, S. B., Gassner, O. S., Lamla, S., Le Clech, M., et al.  
613 (2007). Cep164, a novel centriole appendage protein required for primary cilium  
614 formation. *J. Cell Biol.* 179, 321–330. doi: 10.1083/jcb.200707181.
- 615 Hamidi, A., Song, J., Thakur, N., Itoh, S., Marcusson, A., Bergh, A., et al. (2017). TGF- $\beta$   
616 promotes PI3K-AKT signaling and prostate cancer cell migration through the TRAF6-  
617 mediated ubiquitylation of p85 $\alpha$ . *Sci. Signal.* 10. doi: 10.1126/SCISIGNAL.AAL4186.

- 618 Hearn, T. (2018). ALMS1 and Alström syndrome: a recessive form of metabolic,  
619 neurosensory and cardiac deficits. *J. Mol. Med.* doi: 10.1007/s00109-018-1714-x.
- 620 Hearn, T., Spalluto, C., Phillips, V. J., Renforth, G. L., Copin, N., Hanley, N. A., et al. (2005).  
621 Subcellular Localization of ALMS1 Supports Involvement of Centrosome and Basal  
622 Body Dysfunction in the Pathogenesis of Obesity, Insulin Resistance, and Type 2  
623 Diabetes. *Diabetes* 54, 1581 LP – 1587. doi: 10.2337/diabetes.54.5.1581.
- 624 Hehnly, H., Chen, C. T., Powers, C. M., Liu, H. L., and Doxsey, S. (2012). The Centrosome  
625 Regulates the Rab11- Dependent Recycling Endosome Pathway at Appendages of  
626 the Mother Centriole. *Curr. Biol.* 22, 1944–1950. doi: 10.1016/J.CUB.2012.08.022.
- 627 Hoxhaj, G., and Manning, B. D. (2019). The PI3K–AKT network at the interface of  
628 oncogenic signalling and cancer metabolism. *Nat. Rev. Cancer* 2019 202 20, 74–88.  
629 doi: 10.1038/s41568-019-0216-7.
- 630 Huang-Doran, I., and Semple, R. K. (2010). Knockdown of the Alström syndrome-  
631 associated gene *Alms1* in 3T3-L1 preadipocytes impairs adipogenesis but has no  
632 effect on cell-autonomous insulin action. *Int. J. Obes.* 2010 3410 34, 1554–1558.  
633 doi: 10.1038/ijo.2010.92.
- 634 Ishikawa, H., and Marshall, W. F. (2011). Ciliogenesis: building the cell’s antenna. *Nat.*  
635 *Rev. Mol. Cell Biol.* 12, 222–234. doi: 10.1038/NRM3085.
- 636 Jagger, D., Collin, G., Kelly, J., Towers, E., Nevill, G., Longo-Guess, C., et al. (2011). Alström  
637 Syndrome protein ALMS1 localizes to basal bodies of cochlear hair cells and  
638 regulates cilium-dependent planar cell polarity. *Hum. Mol. Genet.* 20, 466–481. doi:  
639 10.1093/hmg/ddq493.
- 640 Jaykumar, A. B., Caceres, P. S., King-Medina, K. N., Liao, T.-D., Datta, I., Maskey, D., et al.  
641 (2018). Role of Alström syndrome 1 in the regulation of blood pressure and renal  
642 function. *JCI insight* 3, e95076. doi: 10.1172/jci.insight.95076.
- 643 Kang, H. M., Ahn, S. H., Choi, P., Ko, Y. A., Han, S. H., Chinga, F., et al. (2014). Defective  
644 fatty acid oxidation in renal tubular epithelial cells has a key role in kidney fibrosis  
645 development. *Nat. Med.* 2014 211 21, 37–46. doi: 10.1038/nm.3762.

- 646 Kasza, I., Suh, Y., Wollny, D., Clark, R. J., Roopra, A., Colman, R. J., et al. (2014). Syndecan-  
647 1 Is Required to Maintain Intradermal Fat and Prevent Cold Stress. *PLOS Genet.* 10,  
648 e1004514. doi: 10.1371/JOURNAL.PGEN.1004514.
- 649 Kato, M., Putta, S., Wang, M., Yuan, H., Lanting, L., Nair, I., et al. (2009). TGF-beta  
650 activates Akt kinase through a microRNA-dependent amplifying circuit targeting  
651 PTEN. *Nat. Cell Biol.* 11, 881–889. doi: 10.1038/NCB1897.
- 652 Knorz, V. J., Spalluto, C., Lessard, M., Purvis, T. L., Adigun, F. F., Collin, G. B., et al. (2010).  
653 Centriolar association of ALMS1 and likely centrosomal functions of the ALMS  
654 motif-containing proteins C10orf90 and KIAA1731. *Mol. Biol. Cell* 21, 3617–29. doi:  
655 10.1091/mbc.E10-03-0246.
- 656 Kobayashi, T., and Dynlacht, B. D. (2011). Regulating the transition from centriole to  
657 basal body. *J. Cell Biol.* 193, 435–444. doi: 10.1083/JCB.201101005.
- 658 Kuleshov, M. V., Jones, M. R., Rouillard, A. D., Fernandez, N. F., Duan, Q., Wang, Z., et al.  
659 (2016). Enrichr: a comprehensive gene set enrichment analysis web server 2016  
660 update. *Nucleic Acids Res.* 44, W90. doi: 10.1093/NAR/GKW377.
- 661 Leitch, C. C., Lodh, S., Prieto-Echagüe, V., Badano, J. L., and Zaghloul, N. A. (2014). Basal  
662 body proteins regulate Notch signaling through endosomal trafficking. *J. Cell Sci.*  
663 127, 2407–19. doi: 10.1242/jcs.130344.
- 664 Li, G., Vega, R., Nelms, K., Gekakis, N., Goodnow, C., McNamara, P., et al. (2007). A role  
665 for Alström syndrome protein, *alms1*, in kidney ciliogenesis and cellular quiescence.  
666 *PLoS Genet.* 3, e8. doi: 10.1371/journal.pgen.0030008.
- 667 Liao, Y., and Hung, M. C. (2010). Physiological regulation of Akt activity and stability. *Am.*  
668 *J. Transl. Res.* 2, 19. Available at: /pmc/articles/PMC2826820/ [Accessed August 22,  
669 2022].
- 670 Liu, R. M., and Desai, L. P. (2015). Reciprocal regulation of TGF- $\beta$  and reactive oxygen  
671 species: A perverse cycle for fibrosis. *Redox Biol.* 6, 565. doi:  
672 10.1016/J.REDOX.2015.09.009.
- 673 Love, M. I., Huber, W., and Anders, S. (2014). Moderated estimation of fold change and

- 674 dispersion for RNA-seq data with DESeq2. *Genome Biol.* 15, 550. doi:  
675 10.1186/s13059-014-0550-8.
- 676 May-Simera, H. L., Wan, Q., Jha, B. S., Hartford, J., Khristov, V., Dejene, R., et al. (2018).  
677 Primary Cilium-Mediated Retinal Pigment Epithelium Maturation Is Disrupted in  
678 Ciliopathy Patient Cells. *Cell Rep.* 22, 189–205. doi: 10.1016/j.celrep.2017.12.038.
- 679 May-Simera, H., Nagel-Wolfrum, K., and Wolfrum, U. (2017). Cilia - The sensory  
680 antennae in the eye. *Prog. Retin. Eye Res.* 60, 144–180. doi:  
681 10.1016/J.PRETEYERES.2017.05.001.
- 682 Merico, D., Isserlin, R., Stueker, O., Emili, A., and Bader, G. D. (2010). Enrichment Map:  
683 A Network-Based Method for Gene-Set Enrichment Visualization and  
684 Interpretation. *PLoS One* 5, e13984. doi: 10.1371/JOURNAL.PONE.0013984.
- 685 Mönnich, M., Borgeskov, L., Breslin, L., Jakobsen, L., Rogowski, M., Doganli, C., et al.  
686 (2018). CEP128 Localizes to the Subdistal Appendages of the Mother Centriole and  
687 Regulates TGF- $\beta$ /BMP Signaling at the Primary Cilium. *Cell Rep.* 22, 2584–2592. doi:  
688 10.1016/J.CELREP.2018.02.043.
- 689 Pala, R., Alomari, N., and Nauli, S. M. (2017). Primary Cilium-Dependent Signaling  
690 Mechanisms. *Int. J. Mol. Sci.* 18. doi: 10.3390/IJMS18112272.
- 691 Patel, S., Tang, J., Overstreet, J. M., Anorga, S., Lian, F., Arnouk, A., et al. (2019). Rac-  
692 GTPase promotes fibrotic TGF- $\beta$ 1 signaling and chronic kidney disease via EGFR,  
693 p53, and Hippo/YAP/TAZ pathways. *FASEB J.* 33, 9797–9810. doi:  
694 10.1096/FJ.201802489RR.
- 695 Perez-Riverol, Y., Csordas, A., Bai, J., Bernal-Llinares, M., Hewapathirana, S., Kundu, D.  
696 J., et al. (2019). The PRIDE database and related tools and resources in 2019:  
697 improving support for quantification data. *Nucleic Acids Res.* 47, D442–D450. doi:  
698 10.1093/nar/gky1106.
- 699 Rahimi, R. A., and Leof, E. B. (2007). TGF- $\beta$  signaling: A tale of two responses. *J. Cell.*  
700 *Biochem.* 102, 593–608. doi: 10.1002/JCB.21501.
- 701 Reimand, J., Isserlin, R., Voisin, V., Kucera, M., Tannus-Lopes, C., Rostamianfar, A., et al.

- 702 (2019). Pathway enrichment analysis and visualization of omics data using  
703 g:Profiler, GSEA, Cytoscape and EnrichmentMap. *Nat. Protoc.* 14, 482–517. doi:  
704 10.1038/S41596-018-0103-9.
- 705 Ritchie, M. E., Phipson, B., Wu, D., Hu, Y., Law, C. W., Shi, W., et al. (2015). limma powers  
706 differential expression analyses for RNA-sequencing and microarray studies.  
707 *Nucleic Acids Res.* 43, e47–e47. doi: 10.1093/NAR/GKV007.
- 708 Romano, S., Milan, G., Veronese, C., Collin, G. B., Marshall, J. D., Centobene, C., et al.  
709 (2008). Regulation of Alström syndrome gene expression during adipogenesis and  
710 its relationship with fat cell insulin sensitivity. *Int. J. Mol. Med.* 21, 731–736. doi:  
711 10.3892/IJMM.21.6.731/HTML.
- 712 Schindelin, J., Arganda-Carreras, I., Frise, E., Kaynig, V., Longair, M., Pietzsch, T., et al.  
713 (2012). Fiji: an open-source platform for biological-image analysis. *Nat. Methods*  
714 *2012* 9, 676–682. doi: 10.1038/nmeth.2019.
- 715 Serra, D., Mera, P., Malandrino, M. I., Mir, J. F., and Herrero, L. (2013). Mitochondrial  
716 Fatty Acid Oxidation in Obesity. <https://home.liebertpub.com/ars> 19, 269–284. doi:  
717 10.1089/ARS.2012.4875.
- 718 Shenje, L. T., Andersen, P., Halushka, M. K., Lui, C., Fernandez, L., Collin, G. B., et al.  
719 (2014). Mutations in Alström protein impair terminal differentiation of  
720 cardiomyocytes. *Nat. Commun.* 5, 3416. doi: 10.1038/ncomms4416.
- 721 Varet, H., Brillet-Guéguen, L., Coppée, J.-Y., and Dillies, M.-A. (2016). SARTools: A  
722 DESeq2- and EdgeR-Based R Pipeline for Comprehensive Differential Analysis of  
723 RNA-Seq Data. *PLoS One* 11, e0157022. Available at:  
724 <https://doi.org/10.1371/journal.pone.0157022>.
- 725 Wickham, H. (2016). *ggplot2: Elegant Graphics for Data Analysis*. Springer-Verlag New  
726 York Available at: <https://ggplot2.tidyverse.org>.
- 727 Xu, W., Yang, Z., and Lu, N. (2015). A new role for the PI3K/Akt signaling pathway in the  
728 epithelial-mesenchymal transition.  
729 <http://dx.doi.org/10.1080/19336918.2015.1016686> 9, 317–324. doi:  
730 10.1080/19336918.2015.1016686.



- 731 Yang, C., Chen, X. C., Li, Z. H., Wu, H. L., Jing, K. P., Huang, X. R., et al. (2020). SMAD3  
732 promotes autophagy dysregulation by triggering lysosome depletion in tubular  
733 epithelial cells in diabetic nephropathy. *https://doi.org/10.1080/15548627.2020.1824694* 17, 2325–2344. doi:  
734 [10.1080/15548627.2020.1824694](https://doi.org/10.1080/15548627.2020.1824694).  
735
- 736 Yu, J. S. L., and Cui, W. (2016). Proliferation, survival and metabolism: the role of  
737 PI3K/AKT/mTOR signalling in pluripotency and cell fate determination.  
738 *Development* 143, 3050–3060. doi: [10.1242/DEV.137075](https://doi.org/10.1242/DEV.137075).
- 739 Zhang, X., Smits, A. H., van Tilburg, G. B., Ovaa, H., Huber, W., and Vermeulen, M. (2018).  
740 Proteome-wide identification of ubiquitin interactions using UbiA-MS. *Nat. Protoc.*  
741 13, 530–550. doi: [10.1038/nprot.2017.147](https://doi.org/10.1038/nprot.2017.147).
- 742 Zulato, E., Favaretto, F., Veronese, C., Campanaro, S., Marshall, J. D., Romano, S., et al.  
743 (2011). ALMS1-deficient fibroblasts over-express extra-cellular matrix components,  
744 display cell cycle delay and are resistant to apoptosis. *PLoS One* 6, e19081–e19081.  
745 doi: [10.1371/journal.pone.0019081](https://doi.org/10.1371/journal.pone.0019081).  
746
