# Supplementary material for: Loss of the centrosomal protein ALMS1 alters lipid metabolism and the regulation of extracellular matrix-related processes
Source: bioRxiv or medRxiv preprint supplement (doi:10.1101/2022.11.02.514847), 2023-08-12
Supplement: Supplementary file [file media-1.pdf]

# Loss of the centrosomal protein ALMS1 alters lipid metabolism and the regulation of extracellular matrix-related processes

Brais Bea-Mascato<sup>1,2</sup>, Eduardo Gómez-Castañeda<sup>4</sup>, Yara E. Sánchez-Corrales<sup>3</sup>, Sergi Castellano<sup>3,5</sup>, Diana Valverde<sup>\*1,2</sup>

<sup>1</sup> CINBIO, Universidad de Vigo, 36310, Spain.

<sup>2</sup> Grupo de Investigación en Enfermedades Raras y Medicina Pediátrica, Instituto de Investigación Sanitaria Galicia Sur (IIS Galicia Sur), SERGAS-UVIGO, Vigo, Spain

<sup>3</sup> Genetics and Genomic Medicine Department, Great Ormond Street Institute of Child Health, University College London, London, United Kingdom

<sup>4</sup> Molecular and Cellular Immunology Section, Great Ormond Street Institute of Child Health, University College London, London, United Kingdom

<sup>5</sup> UCL Genomics, Zayed Centre for Research into Rare Disease in Children, University College London, London, United Kingdom

\*Correspondence: Diana Valverde. Email [dianaval@uvigo.es](mailto:dianaval@uvigo.es)

CINBIO Facultad de Biología, Universidad de Vigo, Campus As Lagoas-Marcosende s/n, 36310 Vigo, Spain

Tel +34 986 811 953

# Supplementary Figures:

## A

| Sample Name | % Assigned | M Assigned | % Aligned | M Aligned | % Dups | % GC | Length | M Seqs |
|-------------|------------|------------|-----------|-----------|--------|------|--------|--------|
| C1          | 15.6%      | 11.6       | 47.6%     | 12.5      | 66.8%  | 52%  | 122 bp | 26.3   |
| C2          | 20.1%      | 14.2       | 51.1%     | 15.3      | 70.8%  | 53%  | 140 bp | 29.8   |
| C3          | 19.0%      | 10.8       | 48.9%     | 11.6      | 63.6%  | 51%  | 100 bp | 23.6   |
| KO1         | 16.1%      | 19.0       | 46.0%     | 20.4      | 62.3%  | 54%  | 111 bp | 44.4   |
| KO2         | 20.6%      | 11.5       | 53.5%     | 12.3      | 52.0%  | 52%  | 95 bp  | 23.1   |
| KO3         | 24.5%      | 16.1       | 56.8%     | 17.2      | 63.1%  | 53%  | 125 bp | 30.3   |

## B

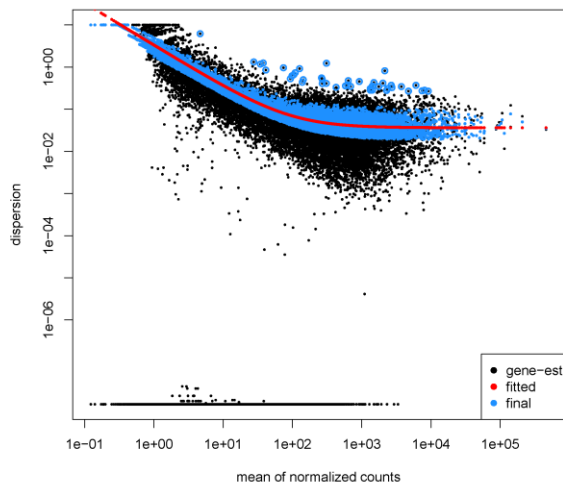

## C

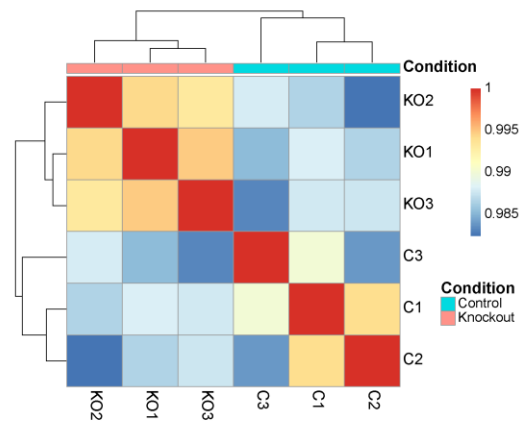

## D

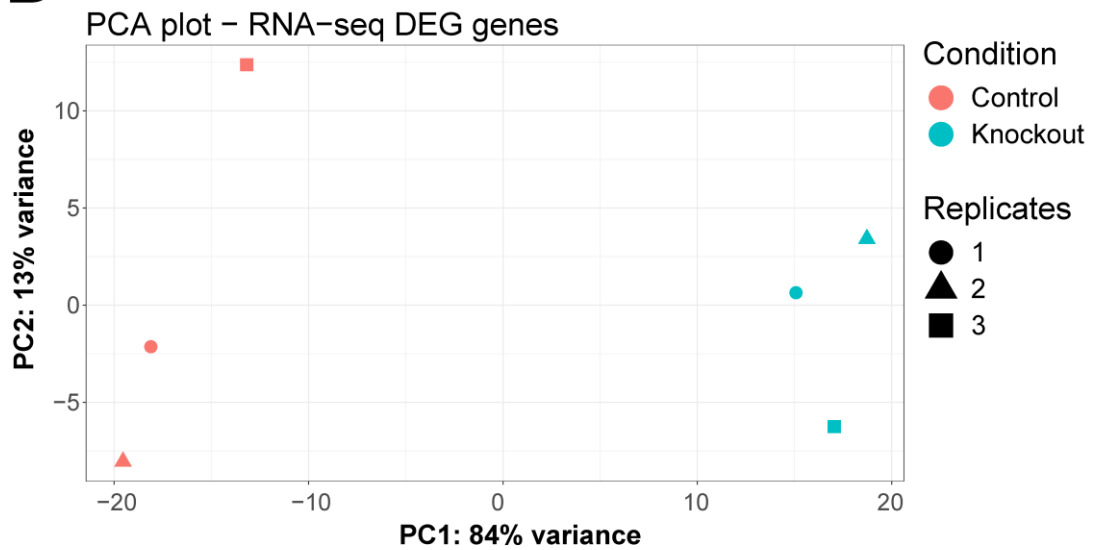

**Supplementary Figure S1.** RNA-seq quality controls. **(A)** Table with the quality controls, showing percentage of assigned, aligned and duplicated reads, GC percentage and average read length. **(B)** Dispersion plot showing the decrease in variance as the normalised mean number of counts in each gene increases. **(C)** Correlation matrix showing similarity between biological replicates of each genotype. **(D)** PCA plot of the RNA-seq samples, where PC1 (genotype) accounts for 84% of the variance between samples.

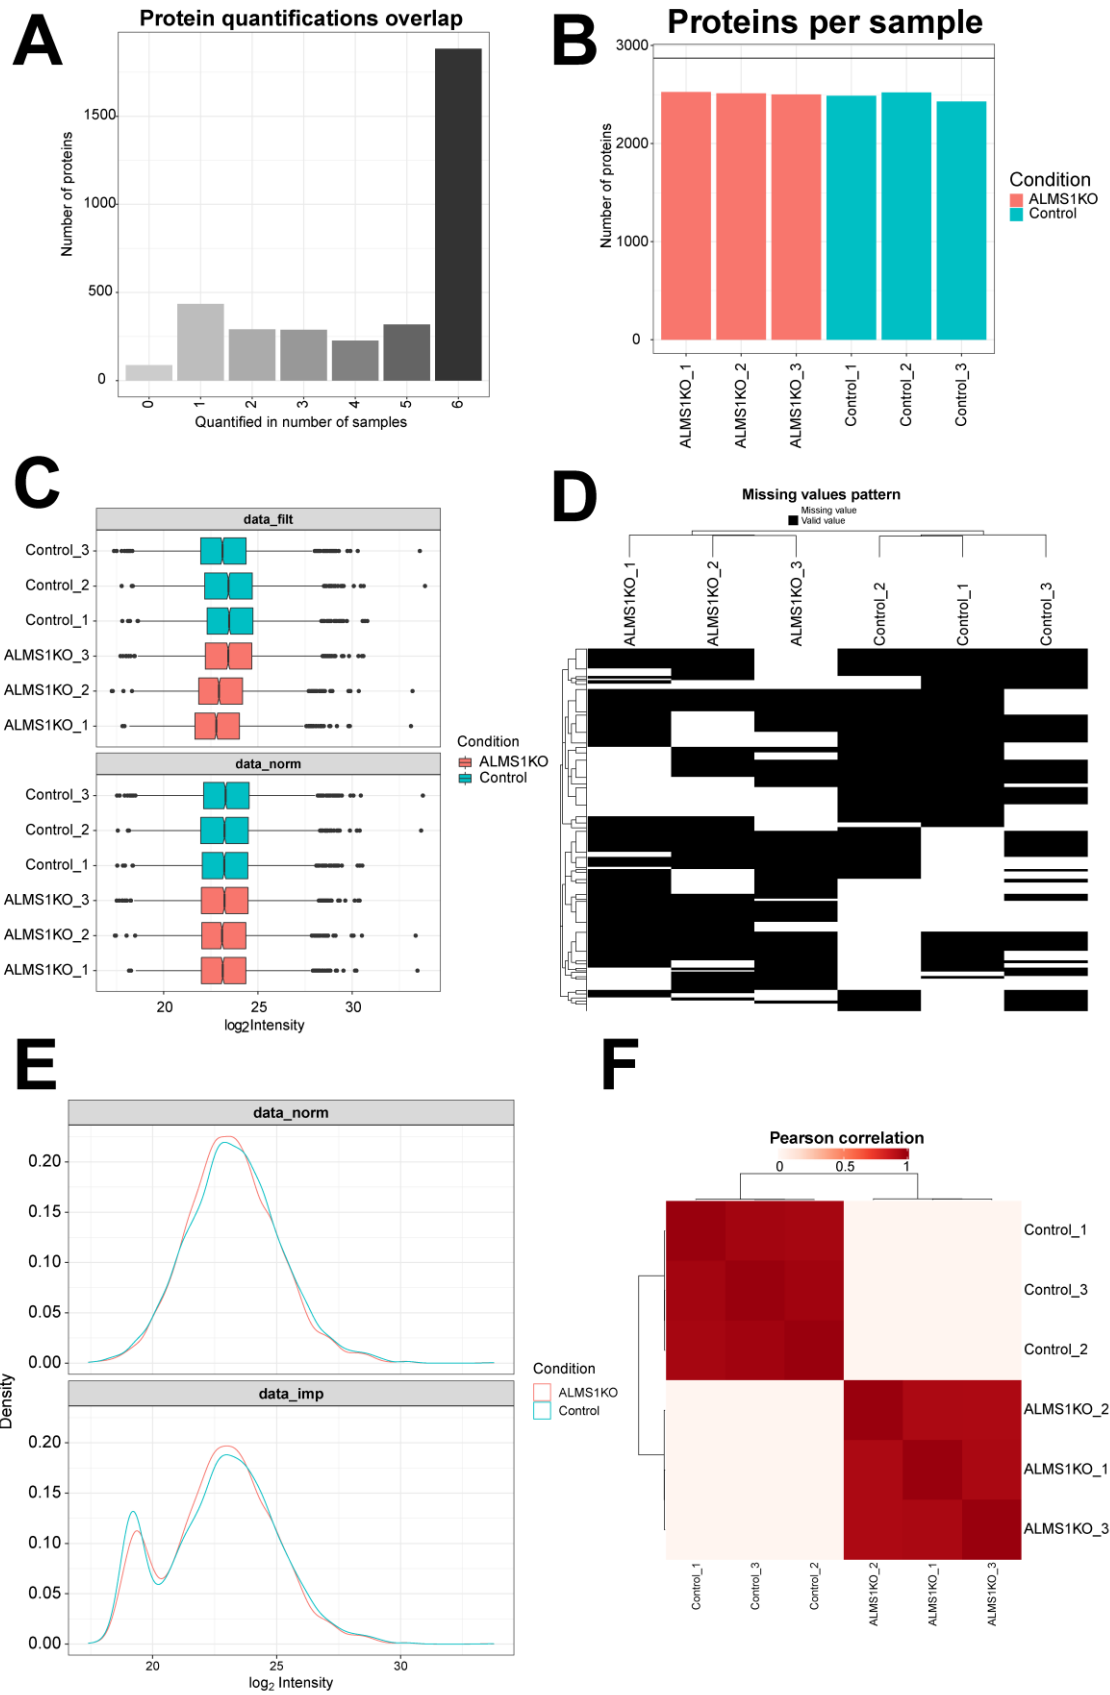

**Supplementary Figure S2. Proteomics quality controls (A) Overlap of proteins quantified in each sample. A total of 1,800 proteins were quantified in all samples. (B) Number of proteins**

identified in each sample. Approximately 2,870 proteins were identified in each sample. **(C)** Box-plots showing the distribution of log<sub>2</sub> Intensity of each protein per sample before and after applying VSN normalisation. **(D)** Heatmap showing the pattern of non-random missing values prior to imputation. **(E)** Density-plot of the distribution of the average log<sub>2</sub> values of the intensities between WT and KO before and after applying the Minprob imputation with an FDR > 0.01. **(F)** Correlation matrix showing similarity between biological replicates of each genotype.
